# Supplementary material for: Decoding lip language using triboelectric sensors with deep learning
Source: PubMed Central journal article supplement (PMC8931018; doi:10.1038/s41467-022-29083-0), 2022-03-17
Supplement: 41467_2022_29083_MOESM2_ESM.pdf [file 41467_2022_29083_MOESM2_ESM.pdf]

## **Description of Additional Supplementary Files**

**File Name:** Supplementary Movie 1

**Description:** Lip-language decoding system (LLDS) used in personal identity verification

**File Name:** Supplementary Movie 2

**Description:** Lip-language decoding system (LLDS) used in direction control of toy car

**File Name:** Supplementary Movie 3

**Description:** Liplanguage decoding system (LLDS) used in lip-motion to voice
